# Supplementary material
Source: PubMed Central journal article supplement (PMC3193283)
Supplement: NIHMS304744-supplement-1.pdf [file NIHMS304744-supplement-1.pdf]

## Electronic Supplementary Materials:

### Chimpanzees (*Pan troglodytes*) Show the Isolation Effect During Serial List Recognition Memory Tests by Michael J. Beran

Animal Cognition

#### Assessing visual similarity of photographic stimuli used in the lists:

A commercially available software package was used to assist in this assessment. The Visual Similarity Duplicate Image Finder (version 3.8.0.1) available at MindGems.com was used. The program was set to visually compare all photographs and report any clusters of images that shared greater than 60% physical similarity. Shown below in the first table are the 48 images that were classified into 1 of 9 resulting clusters, with each cluster shown in a separate column. An initial survey of these clusters demonstrates that, with the exception of images of human faces (Cluster #2), none of the clusters were dominated by a large number of photographs from only one of the 10 semantic categories. [Single letters designate the names of humans.]

| Cluster 1    | Cluster 2 | Cluster 3    | Cluster 4 | Cluster 5 | Cluster 6 | Cluster 7 | Cluster 8  | Cluster 9 |
|--------------|-----------|--------------|-----------|-----------|-----------|-----------|------------|-----------|
| Ball         | C1        | Chalk        | Balloon   | Broccoli  | Carrot    | Brush     | Panbanisha | Cracker   |
| Cheese       | C2        | Paper        | Banana    | Dustpan   | Orange    | Hammer    | Tamuli     | Cup       |
| Keys         | J         | Thermometer  | Kiwi      | Plate     | Straw     |           |            |           |
| Bubbles      | M1        | Sweet potato | Oil       | Apple     |           |           |            |           |
| Mask         | M2        | L            |           |           |           |           |            |           |
| Medicine     | S         |              |           |           |           |           |            |           |
| Peach        | Kanzi     |              |           |           |           |           |            |           |
| Toothbrush   | Mercury   |              |           |           |           |           |            |           |
| Tomato       | Sherman   |              |           |           |           |           |            |           |
| Lemonade     | Raisins   |              |           |           |           |           |            |           |
| Orange drink | Nyota     |              |           |           |           |           |            |           |
| Orange juice |           |              |           |           |           |           |            |           |
| Yogurt       |           |              |           |           |           |           |            |           |
| Panzee       |           |              |           |           |           |           |            |           |
| Pear         |           |              |           |           |           |           |            |           |

To confirm further that the greater visual similarities were not exclusively within-category, each of the above clusters was analyzed by looking at the percent similarities between all possible pairs of photographs in those clusters. The resulting percent similarity measures for each pair of photos within each cluster are presented in the following 9 tables (row by column). Empty cells indicate that there was less than 60% similarity. For each photograph in the first column, the most closely related image across that row is shown in highlighting.

Of these 48 photographs, only 8 were most closely related to another photograph from the same category, and 5 of those 8 were human faces. Even if all of the face photographs were considered as one large category, along with all of the object photographs and the food photographs as two other large categories, only 22 of the 48 photographs were most closely related to another photo from the same supercategory (and 10 of these 22 were in the face supercategory). Thus, semantic classification of these photos was not highly related to perceptual similarity among the photos within a classification.

|              | Ball | Cheese | Keys | Bubbles | Mask | Medicine | Peach | Toothbrush | Tomato | Lemonade | Orange drink | Orange juice | Yogurt | Panzee | Pear |
|--------------|------|--------|------|---------|------|----------|-------|------------|--------|----------|--------------|--------------|--------|--------|------|
| Ball         |      | 66     |      |         |      |          |       |            |        |          |              |              |        |        |      |
| Cheese       | 66   |        | 68   | 69      | 64   | 67       |       | 63         | 68     |          |              |              |        |        |      |
| Keys         |      | 68     |      |         |      | 67       |       |            | 65     |          |              |              |        |        |      |
| Bubbles      |      | 69     |      |         |      |          | 71    |            |        |          |              |              |        |        |      |
| Mask         |      | 64     |      |         |      |          |       |            |        |          | 68           | 69           | 67     |        |      |
| Medicine     |      | 67     | 67   |         |      |          |       |            |        | 62       |              |              |        |        |      |
| Peach        |      |        |      | 71      |      |          |       |            | 66     |          |              |              |        |        |      |
| Toothbrush   |      | 63     |      |         |      |          |       |            | 63     |          |              |              |        |        |      |
| Tomato       |      | 68     | 65   |         |      |          | 66    | 63         |        | 72       |              |              |        |        | 65   |
| Lemonade     |      |        |      |         |      | 62       |       |            | 72     |          |              |              |        |        |      |
| Orange drink |      |        |      |         | 68   |          |       |            |        |          |              |              | 67     |        |      |
| Orange juice |      |        |      |         | 69   |          |       |            |        |          |              |              |        | 71     |      |
| Yogurt       |      |        |      |         | 67   |          |       |            |        |          | 67           |              |        |        |      |
| Panzee       |      |        |      |         |      |          |       |            |        |          |              | 71           |        |        |      |
| Pear         |      |        |      |         |      |          |       |            | 65     |          |              |              |        |        |      |

|         | C1 | C2 | J  | M1 | M2 | S  | Kanzi | Mercury | Sherman | Raisins | Nyota |
|---------|----|----|----|----|----|----|-------|---------|---------|---------|-------|
| C1      |    | 68 | 64 | 73 | 69 |    |       |         |         |         |       |
| C2      | 68 |    | 79 | 72 | 74 | 72 |       |         |         |         |       |
| J       | 64 | 79 |    | 78 | 90 | 69 | 62    |         |         | 64      | 64    |
| M1      | 73 | 72 | 78 |    | 77 |    | 83    | 74      |         | 61      | 61    |
| M2      | 69 | 74 | 90 | 77 |    |    | 63    | 61      |         |         | 67    |
| S       |    | 72 | 69 |    |    |    |       |         |         |         |       |
| Kanzi   |    |    | 62 | 83 | 63 |    |       | 78      | 63      |         |       |
| Mercury |    |    |    | 74 | 61 |    | 78    |         | 67      |         |       |
| Sherman |    |    |    |    |    |    | 63    | 67      |         |         |       |
| Raisins |    |    | 64 | 61 |    |    |       |         |         |         |       |
| Nyota   |    |    | 64 | 61 | 67 |    |       |         |         |         |       |

|              | Chalk | Paper | Thermometer | Sweet potato | L  |
|--------------|-------|-------|-------------|--------------|----|
| Chalk        |       | 68    | 61          | 72           |    |
| Paper        | 68    |       | 74          | 70           | 63 |
| Thermometer  | 61    | 74    |             | 65           |    |
| Sweet potato | 72    | 70    | 65          |              |    |
| L            |       | 63    |             |              |    |

|         | Balloon | Banana | Kiwi | Oil |
|---------|---------|--------|------|-----|
| Balloon |         | 60     | 60   | 71  |
| Banana  | 60      |        |      | 64  |
| Kiwi    | 60      |        |      |     |
| Oil     | 71      | 64     |      |     |

|          | Broccoli | Dustpan | Plate | Apple |
|----------|----------|---------|-------|-------|
| Broccoli |          | 66      | 68    | 66    |
| Dustpan  | 66       |         | 74    | 62    |
| Plate    | 68       | 74      |       | 74    |
| Apple    | 66       | 62      | 74    |       |

|        | Carrot | Orange | Straw |
|--------|--------|--------|-------|
| Carrot |        | 63     | 69    |
| Orange | 63     |        |       |
| Straw  | 69     |        |       |

|        | Brush | Hammer |
|--------|-------|--------|
| Brush  |       | 65     |
| Hammer | 65    |        |

|            | Panbanisha | Tamuli |
|------------|------------|--------|
| Panbanisha |            | 60     |
| Tamuli     | 60         |        |

|         | Cracker | Cup |
|---------|---------|-----|
| Cracker |         | 62  |
| Cup     | 62      |     |
