# Supplementary material
Source: PubMed Central journal article supplement (PMC3193283)
Supplement: NIHMS304744-supplement-2.pdf [file NIHMS304744-supplement-2.pdf]

**Electronic Supplementary Materials:**

**Chimpanzees (*Pan troglodytes*) Show the Isolation Effect During Serial List Recognition Memory Tests by Michael J. Beran**

Animal Cognition

The following pages illustrate the exact photographs used for each of the items in each of the 10 categories outlined in Table 1 of the paper. For privacy reasons, the images of the humans are not presented.

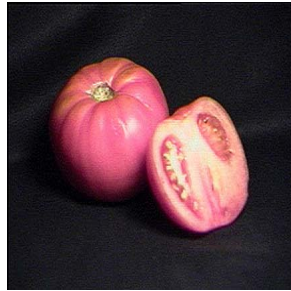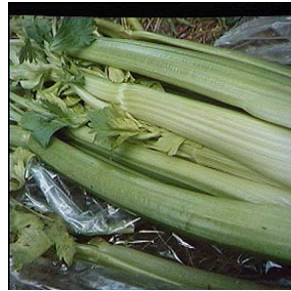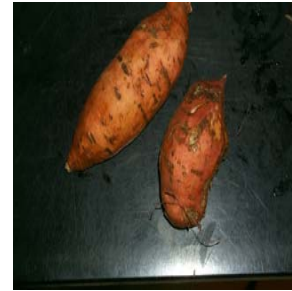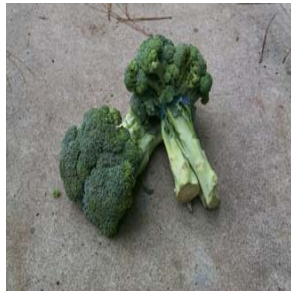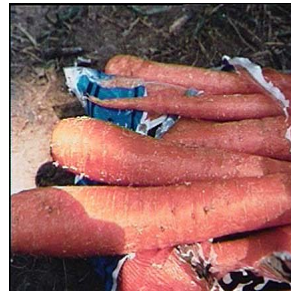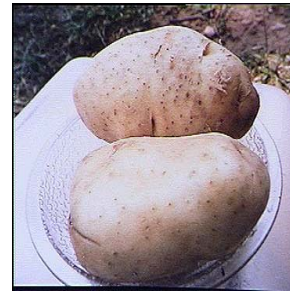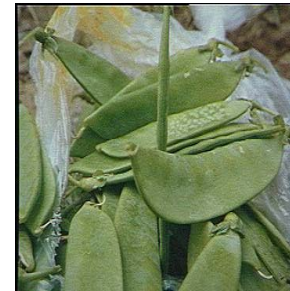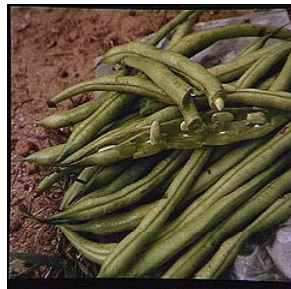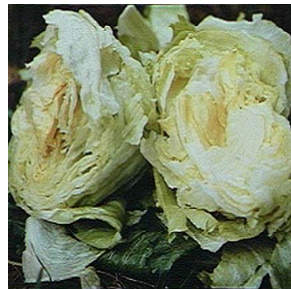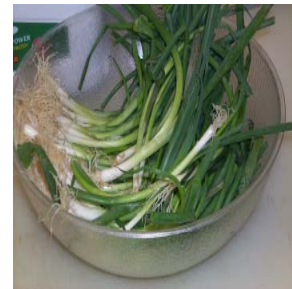

Vegetables

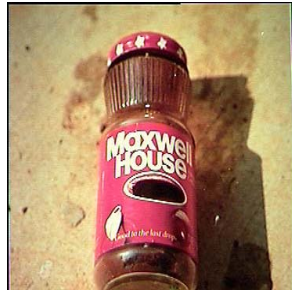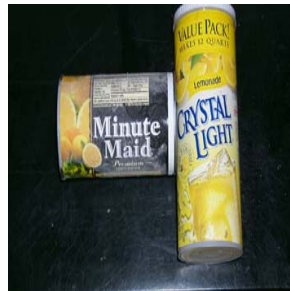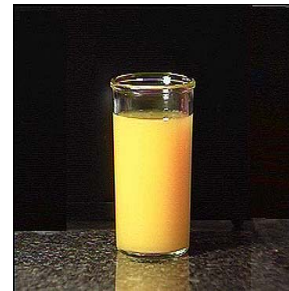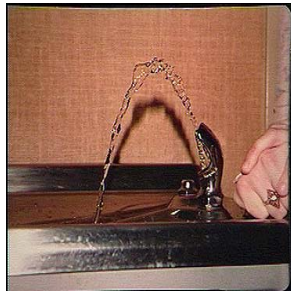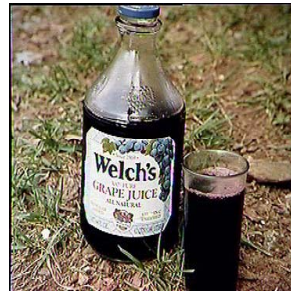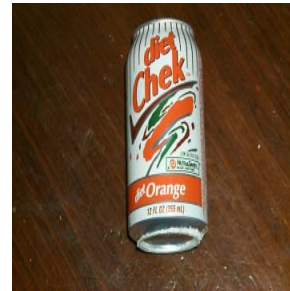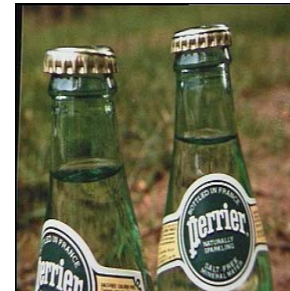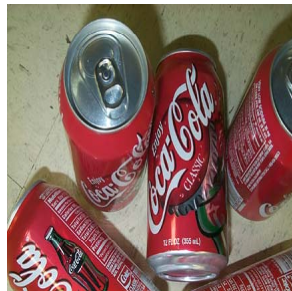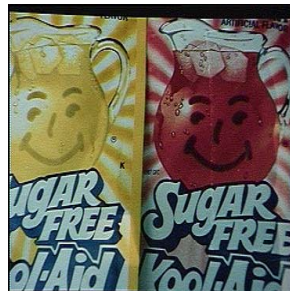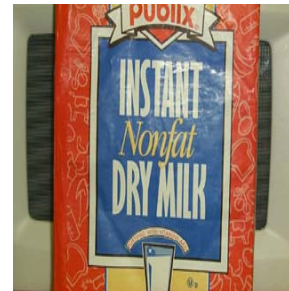

# Fluids

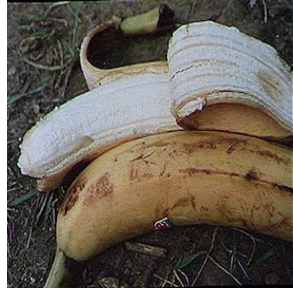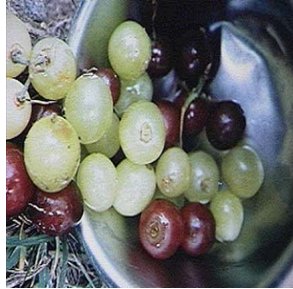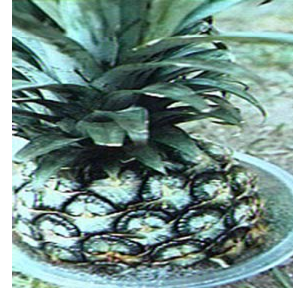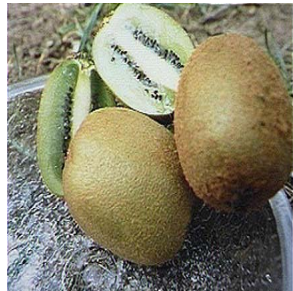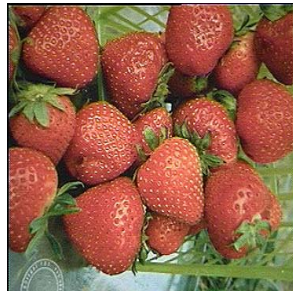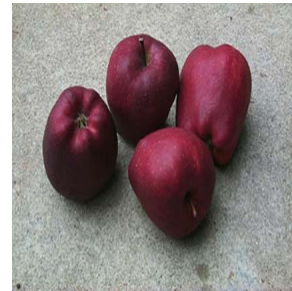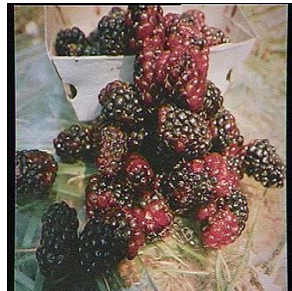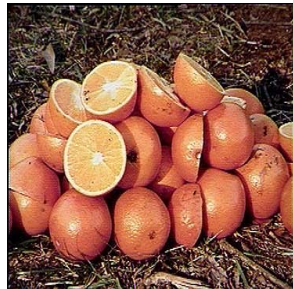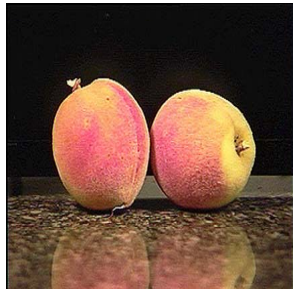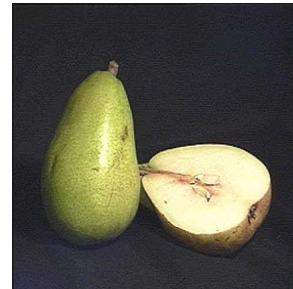

Fruits

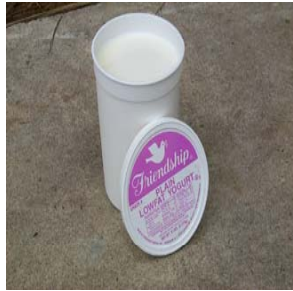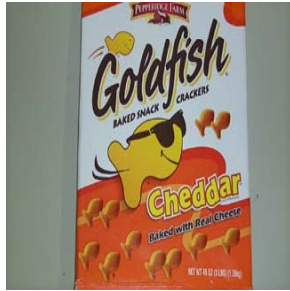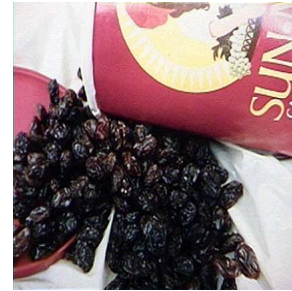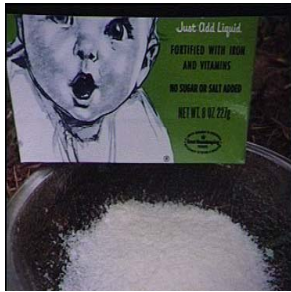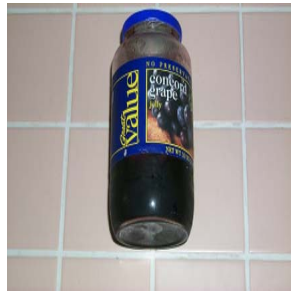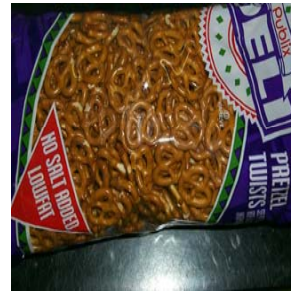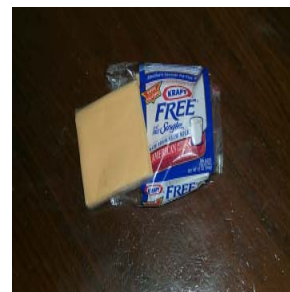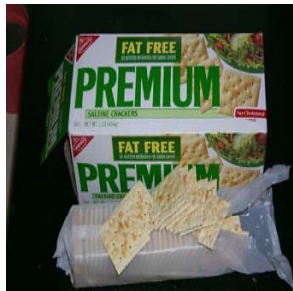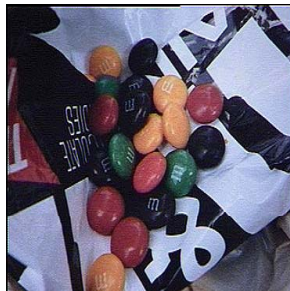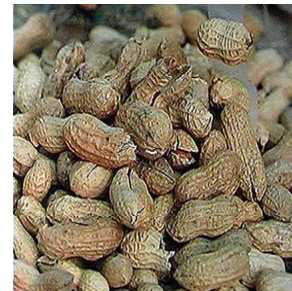

# Treats

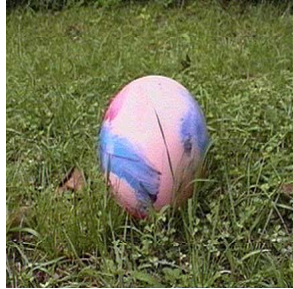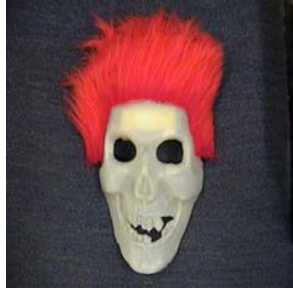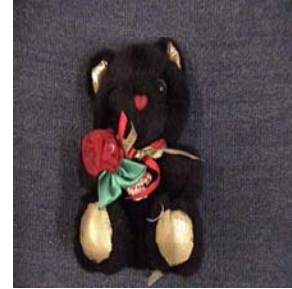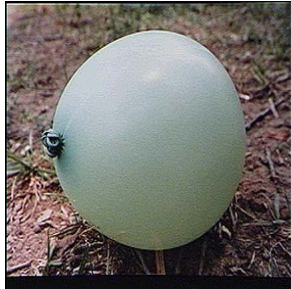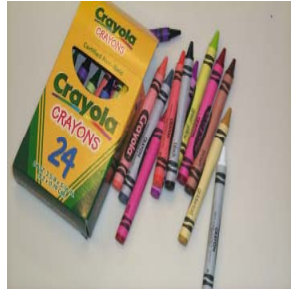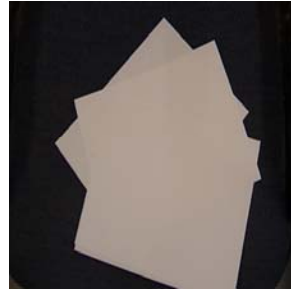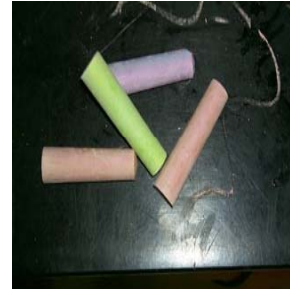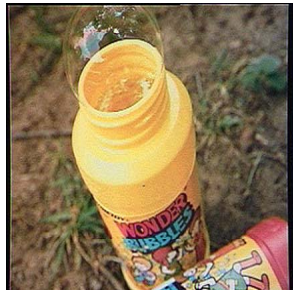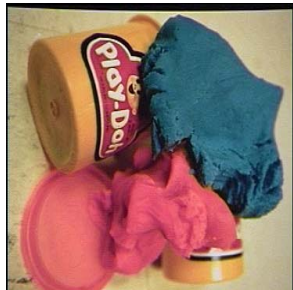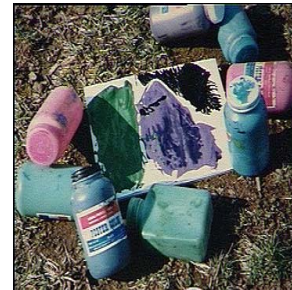

Toys

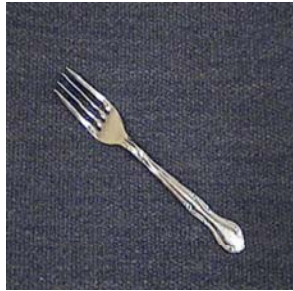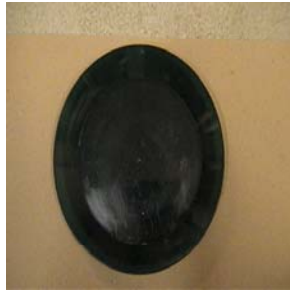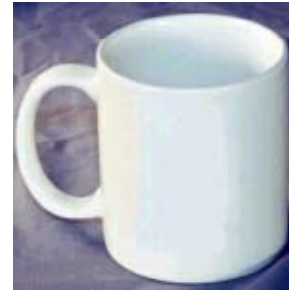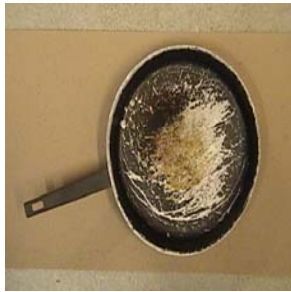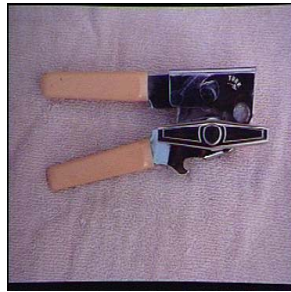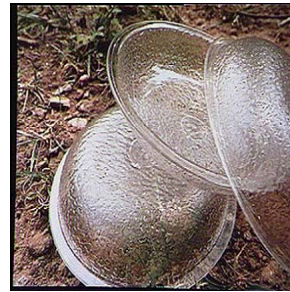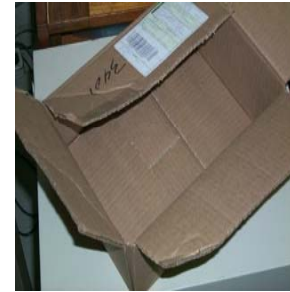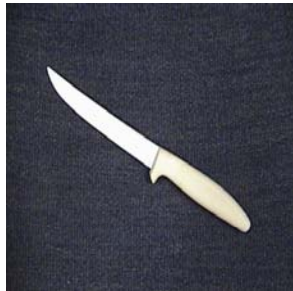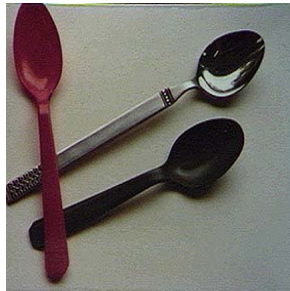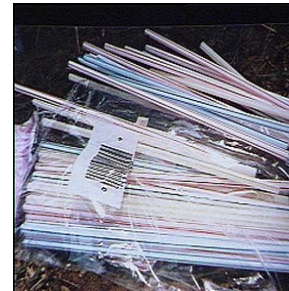

Utensils

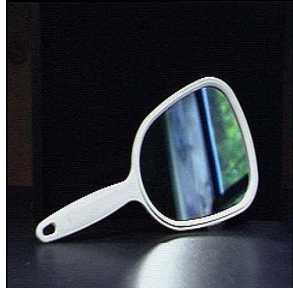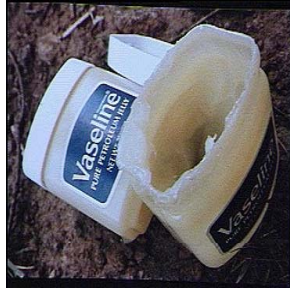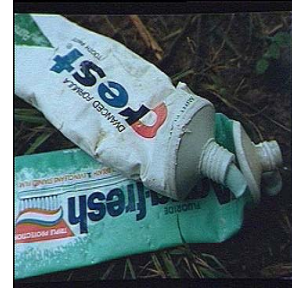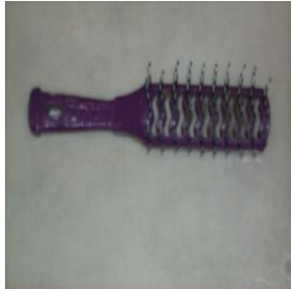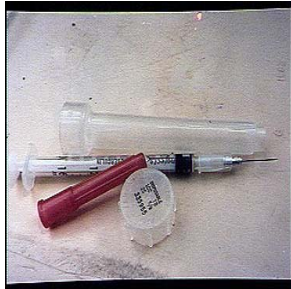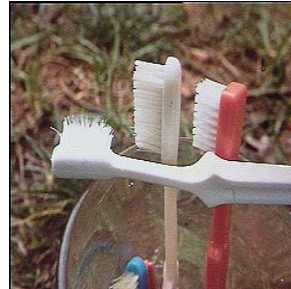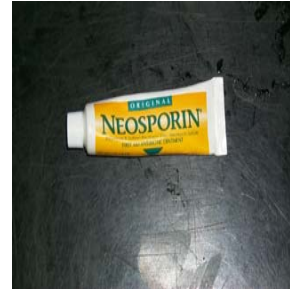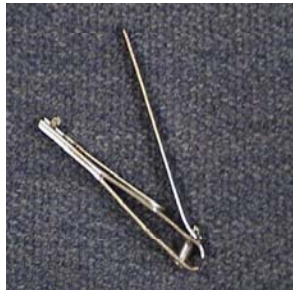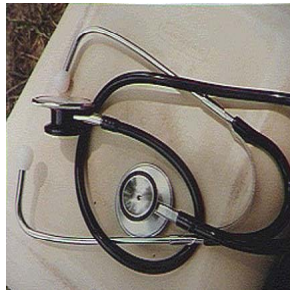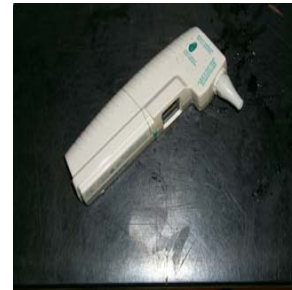

Husbandry



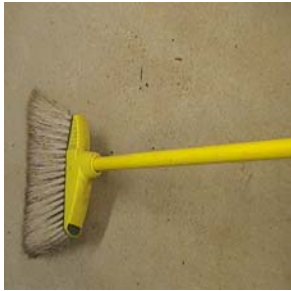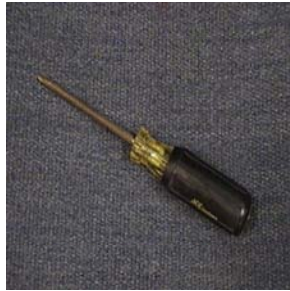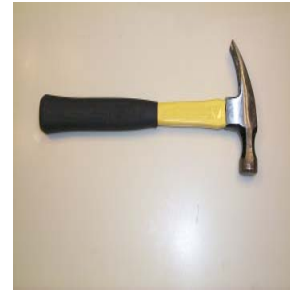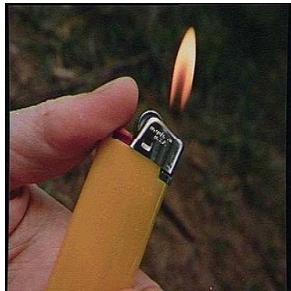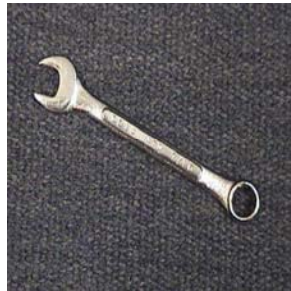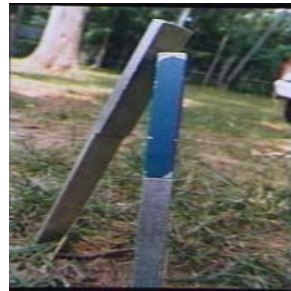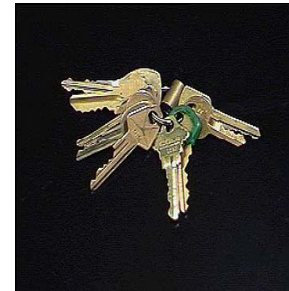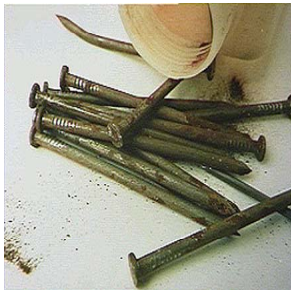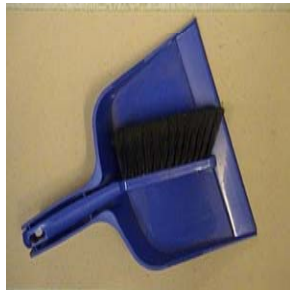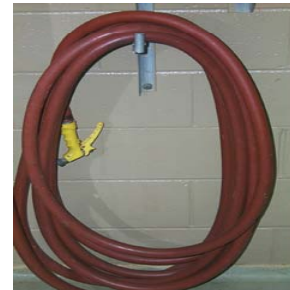

Tools

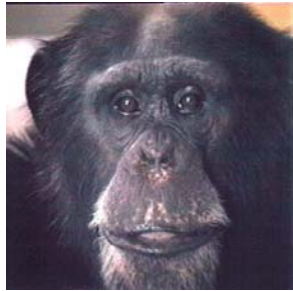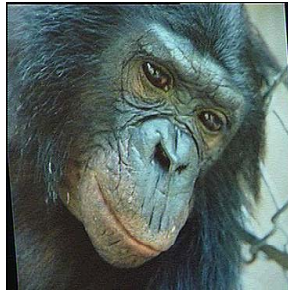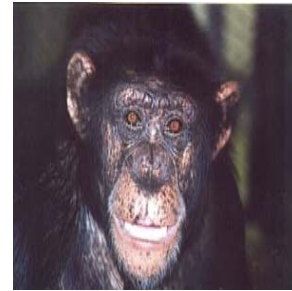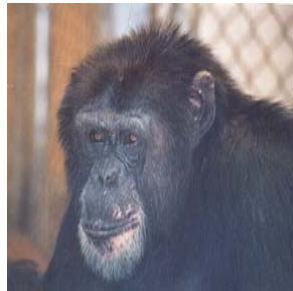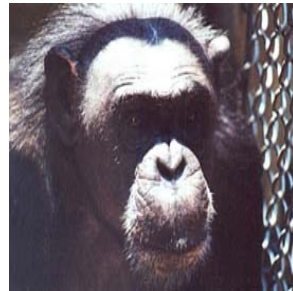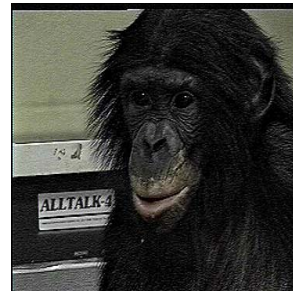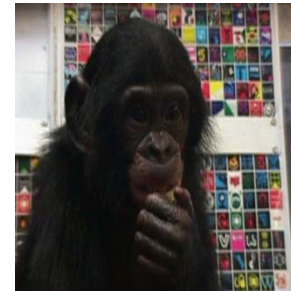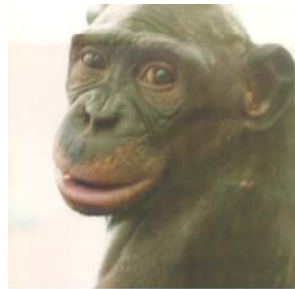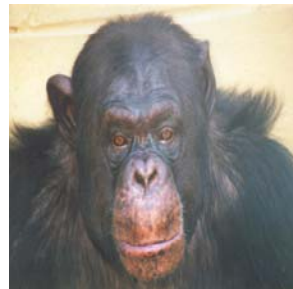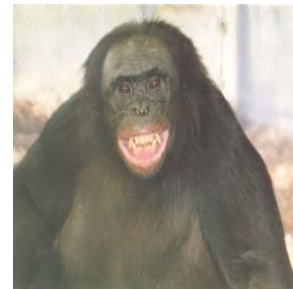

Apes
